# Supplementary material
Source: Springer Nature journal article supplement (https://www.springermedizin.de/resource/supplementary/12875_2013_1059_MOESM2_ESM.pdf/9436054)

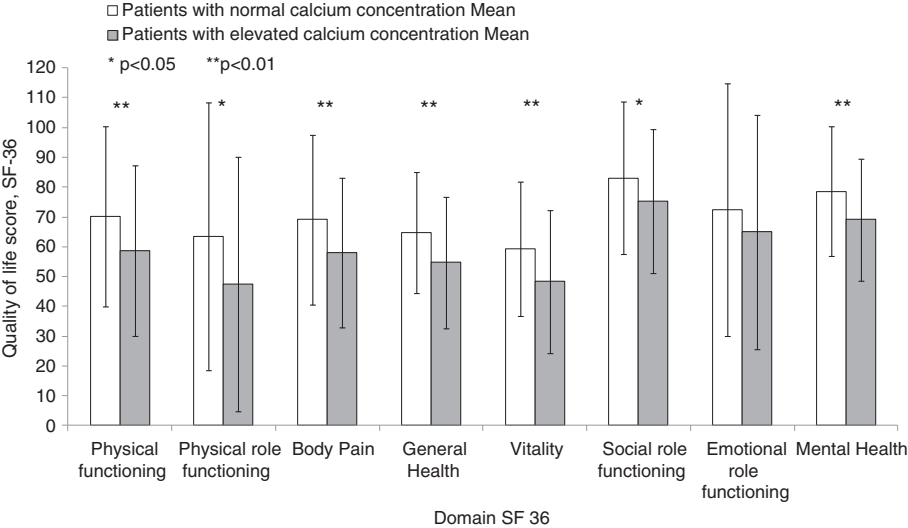

Supplement: MOESM2 [file 9436054]
